# Supplementary material
Source: publisher figshare collection journal article supplement (https://springernature.figshare.com/ndownloader/files/16781516)

**A**

Example of Nuclei Detection  
Experiment 2, Image #1

Example of Nuclei Detection  
Experiment 2, Image #2

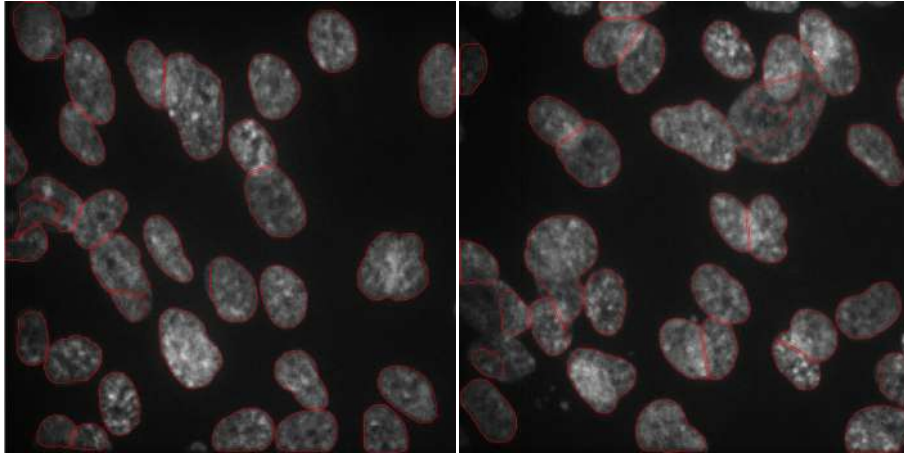

**B**

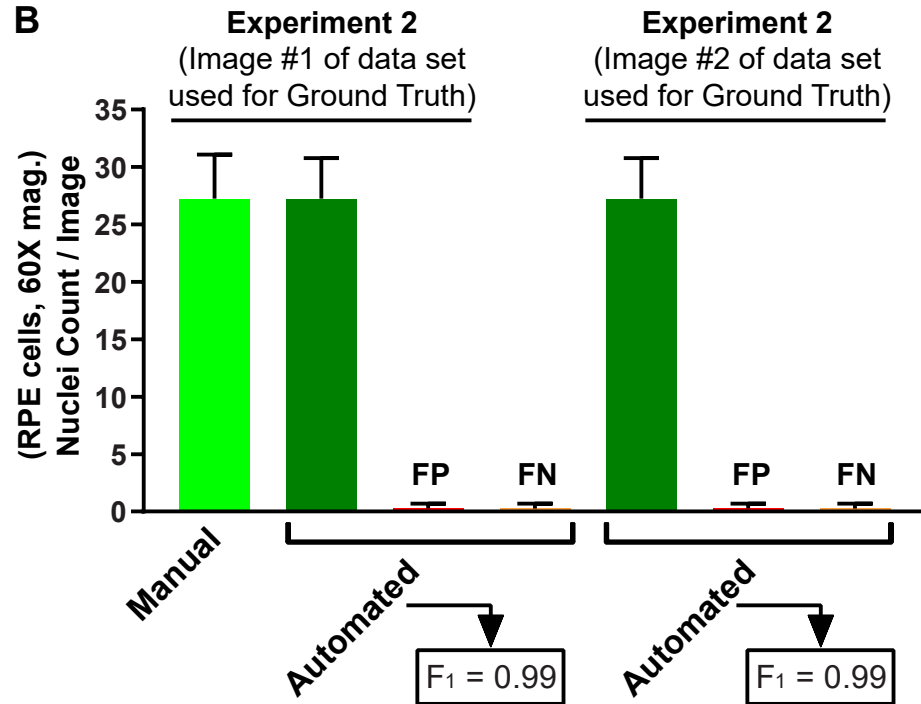

**C**

| RPE cells<br>(Nuclei Count) | Experiment 2<br>(Ground Truth #1) | Experiment 2<br>(Ground Truth #2) |
|-----------------------------|-----------------------------------|-----------------------------------|
| Images Analyzed             | 8                                 | 8                                 |
| Manual                      | 27.3±3.8                          | 27.3±3.8                          |
| Automated                   | 27.3±3.5 (100%)                   | 27.3±3.5 (100%)                   |
| FP                          | 0.3±0.3 (0.9%)                    | 0.3±0.4 (0.9%)                    |
| FN                          | 0.3±0.4 (0.9%)                    | 0.3±0.4 (0.9%)                    |
| Precision ( $\alpha$ )      | 0.99                              | 0.99                              |
| Recall ( $\beta$ )          | 0.99                              | 0.99                              |
| <b>F1 score</b>             | <b>0.99</b>                       | <b>0.99</b>                       |
| Accuracy                    | ++++                              | ++++                              |

**D**

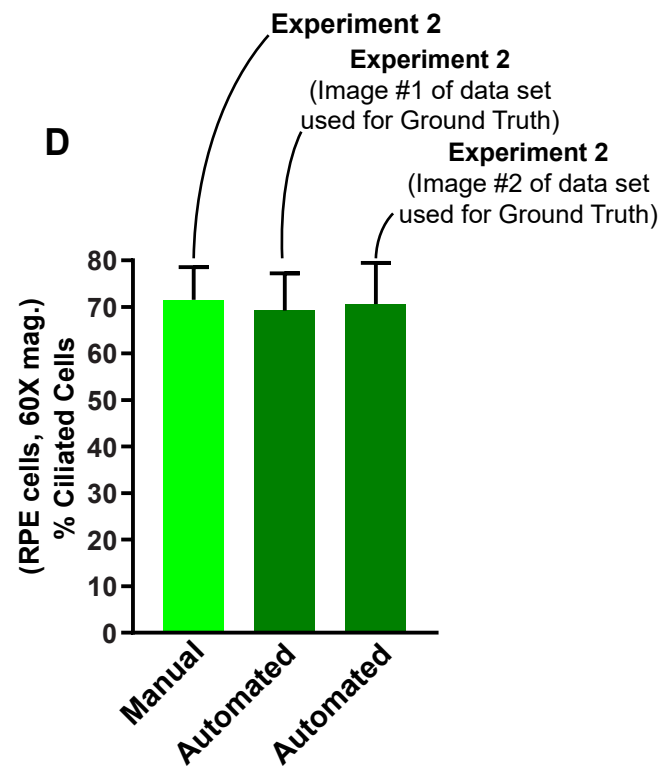

Supplement: Supplementary file [file 16781516]
